# Supplementary material for: Anti-photoaging properties of the phosphodiesterase 3 inhibitor cilostazol in ultraviolet B-irradiated hairless mice
Source: PubMed Central journal article supplement (PMC4971469; doi:10.1038/srep31169), 2016-08-03
Supplement: srep31169-s1.pdf [file srep31169-s1.pdf]

## Supplementary Information

### **Anti-photoaging properties of the phosphodiesterase 3 inhibitor cilostazol in ultraviolet B-irradiated hairless mice**

Ha Neui Kim<sup>1,2</sup>, Chan Hee Gil<sup>1</sup>, Yu Ri Kim<sup>1,2</sup>, Hwa Kyoung Shin<sup>1,2,3</sup>, Byung Tae Choi<sup>1,2,3,\*</sup>

<sup>1</sup>Department of Korean Medicine, School of Korean Medicine, Pusan National University, Yangsan 50612, Korea

<sup>2</sup>Korean Medical Science Research Center for Healthy-Aging, Pusan National University, Yangsan 50612, Korea

<sup>3</sup>Division of Meridian and Structural Medicine, School of Korean Medicine, Pusan National University, Yangsan 50612, Korea

\* Corresponding author: Dr. Byung Tae Choi

Department of Korean Medical Science, School of Korean Medicine, Pusan National University, Yangsan 50612, Republic of Korea

Telephone: +82-51-510-8475; Fax: +82-51-510-8437; E-mail: [choibt@pusan.ac.kr](mailto:choibt@pusan.ac.kr)

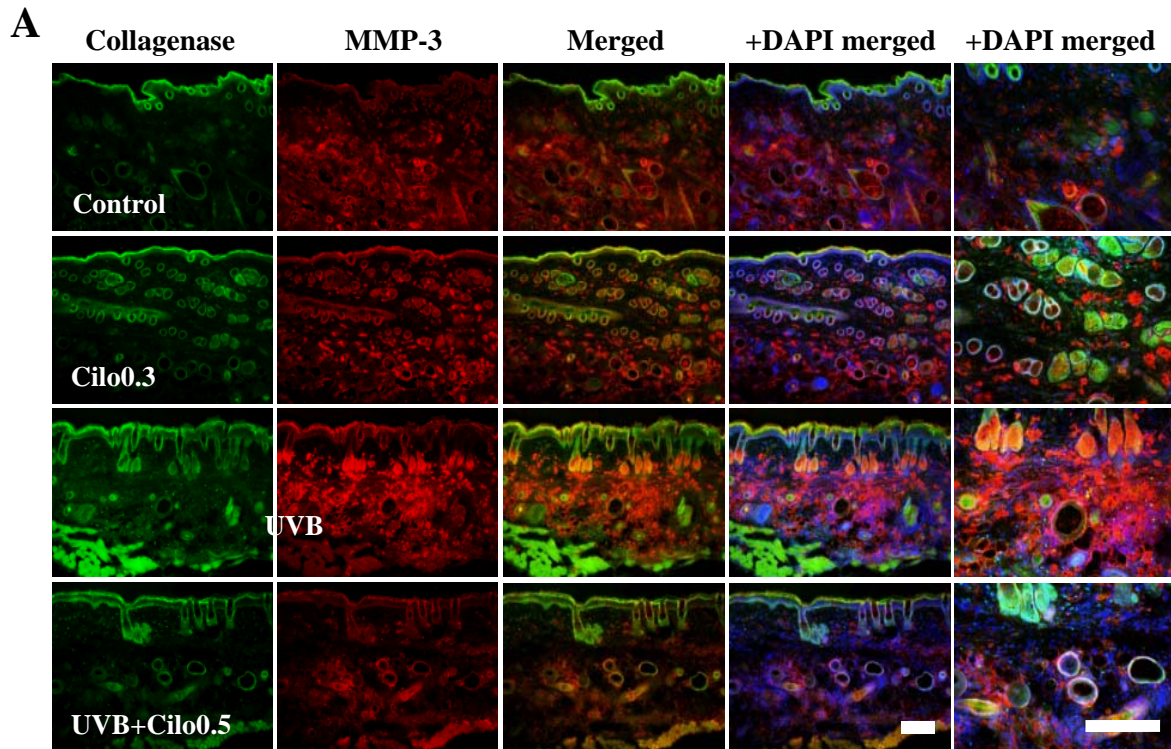

**B**

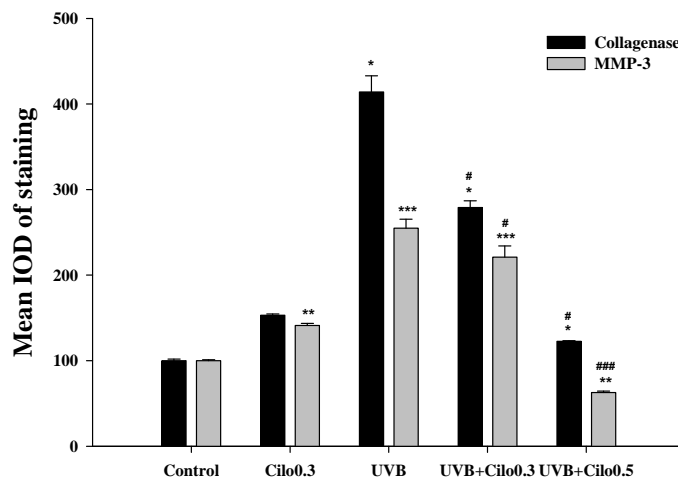

**Supplementary Figure 1. Effect of cilostazol on collagenase and MMP-3 activity in the dorsal skin of UVB-irradiated mice.** (A) Images of *in situ* zymographic analysis for collagenase and MMP-3 and (B) histogram analysis of IOD measurement. Treatment with cilostazol significantly suppressed collagenase activity and MMP-3 expression in the dorsal skin of UVB-irradiated mice. \* $P < 0.05$ , \*\* $P < 0.01$ , and \*\*\* $P < 0.001$  vs. control mice; # $P < 0.05$  and ### $P < 0.001$  vs. UVB-irradiated mice. Scale bar = 200  $\mu\text{m}$ .
